# Supplementary material
Source: PubMed Central journal article supplement (PMC6459120)
Supplement: jamaoncol-5-e185896-s001.pdf [file jamaoncol-5-e185896-s001.pdf]

## Supplementary Online Content

Smith JJ, Strombom P, Chow OS, et al. Assessment of a watch-and-wait strategy for rectal cancer in patients with a complete response after neoadjuvant therapy. *JAMA Oncol*. Published online January 10, 2019. doi:10.1001/jamaoncol.2018.5896

**eFigure 1.** Swimmer Plot of Local Regrowth Patients

**eFigure 2.** Overall Survival (OS), Disease-Free Survival (DFS) and Disease-Specific Survival (DSS) At 5 Years in the Pathologic Complete Response (pCR) Cohort

**eFigure 3.** Five-Year Survival in the WW Cohort in Relation to Treatment Received

**eFigure 4.** Five-Year Overall Survival in the WW Cohort in Relation to MRI Staging

**eTable.** Comparison With Previous Watch-And-Wait Studies

This supplementary material has been provided by the authors to give readers additional information about their work.

Patients with Local Regrowth

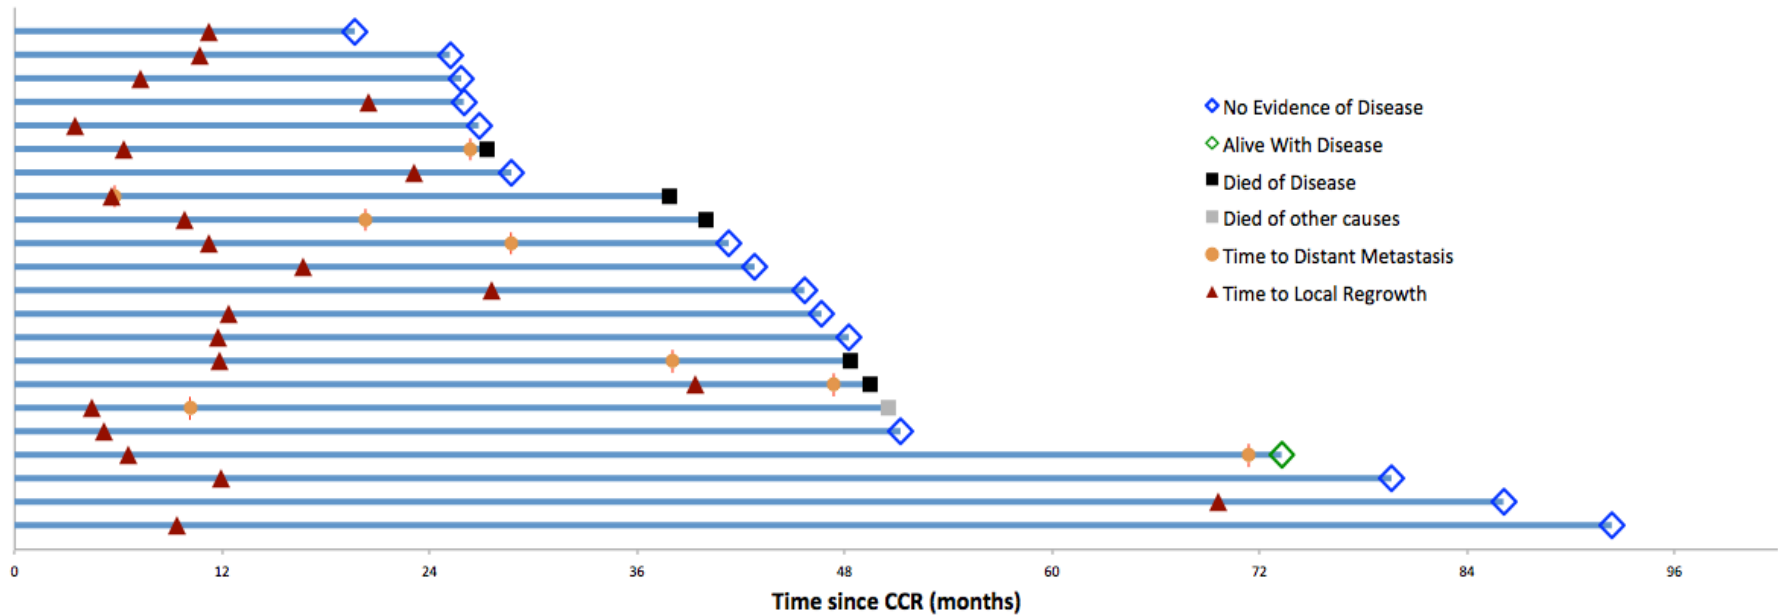

**eFigure 1. Swimmer Plot of Local Regrowth Patients**

Swimmer plot depicting the clinical course of patients from the watch and wait group who had a local regrowth. Patients are plotted in order by length of follow-up from declaration of clinical complete response (cCR). The majority of patients were found to have a local regrowth in the first 12 months (72%) from the date of cCR with a median time of 11.2 months. 15 patients remain free of disease (68%), one is alive with disease, five died of disease and one died of other causes. Patients who developed distant metastasis are denoted by an orange circle, and the one patient with distant metastasis and no current evidence of disease after metastasectomy is also denoted by an orange circle with the open blue diamond.

## Pathologic Complete Response Cohort

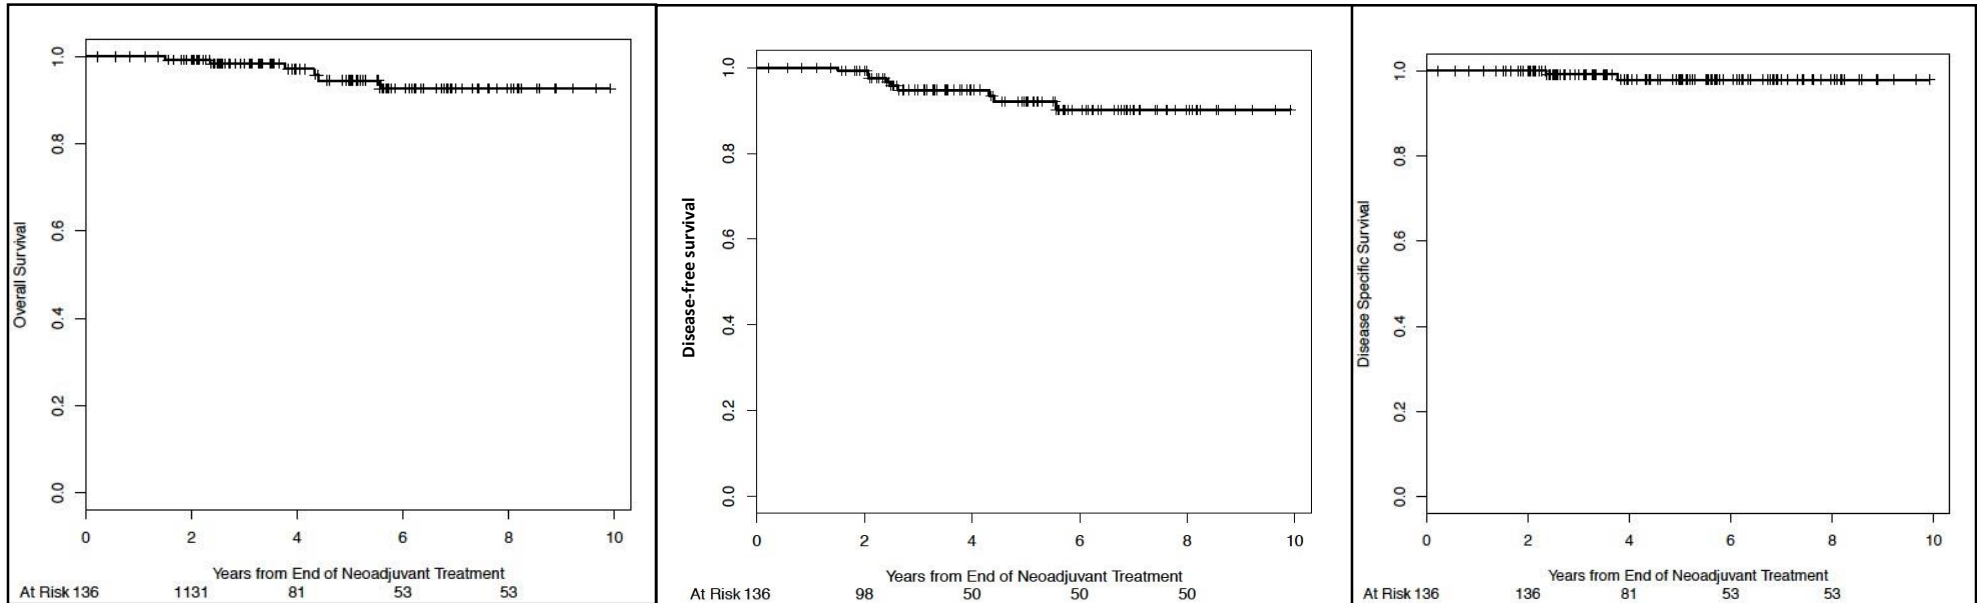

**a. Overall Survival**

**b. Disease-free survival**

**c. Disease-specific survival**

**eFigure 2. Overall Survival (OS), Disease-Free Survival (DFS) and Disease-Specific Survival (DSS) at 5 Years in the Pathologic Complete Response (pCR) Cohort**

a) OS was 94% (95% CI 90%–99%); b) DFS was 92% (95% CI 87%–98%); and c) DSS was 98% (95% CI 95%–100%) in the pCR group. Survival was measured from the end of NAT. DFS events included loco-regional recurrence, distant recurrence, and death from any cause.

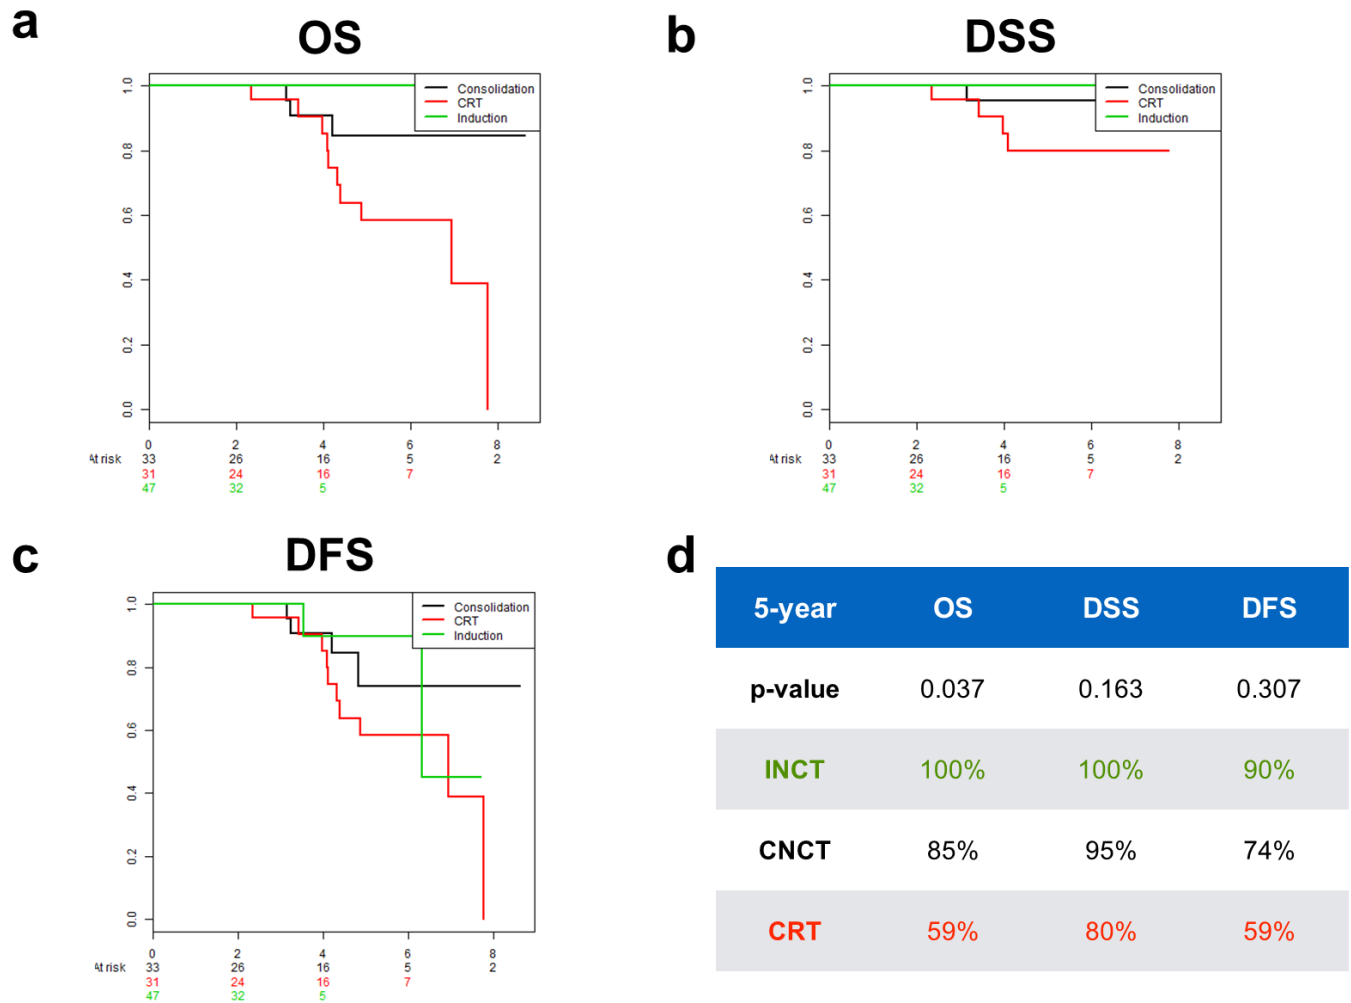

**eFigure 3. Five-Year Survival in the WW Cohort in Relation to Treatment Received**

Patients received (i) induction chemotherapy followed by chemoradiotherapy (INCT), (ii) chemoradiotherapy followed by consolidation chemotherapy (CNCT), or (iii) chemoradiotherapy only (CRT). p-values were calculated using the log-rank test.

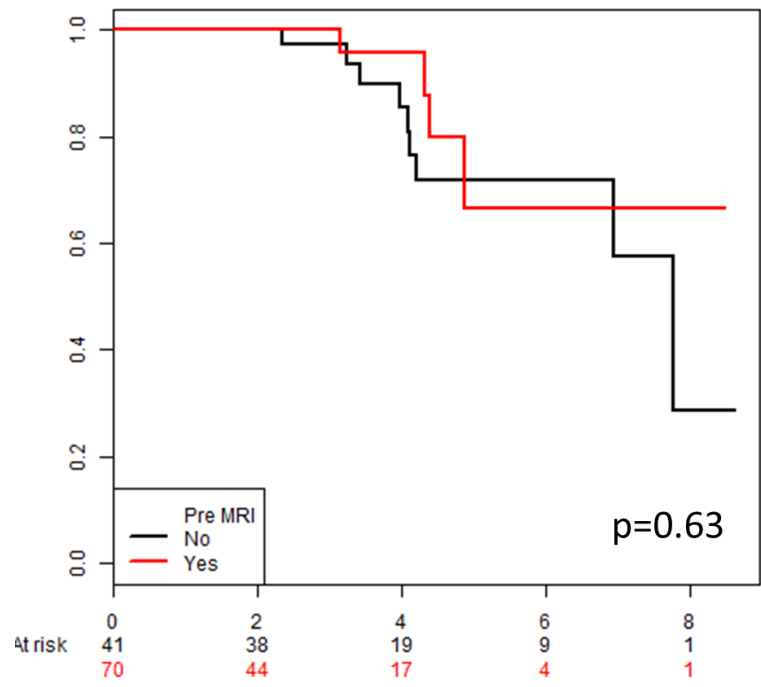

**eFigure 4. Five-Year Overall Survival in the WW Cohort in Relation to MRI Staging**  
 Patients were grouped by whether pretreatment staging of their disease involved MRI.

| <b>eTable. Comparison with Previous Watch-and-Wait (WW) Studies</b> |          |                                 |                 |                 |                                                                                                                                   |                                                                   |            |           |
|---------------------------------------------------------------------|----------|---------------------------------|-----------------|-----------------|-----------------------------------------------------------------------------------------------------------------------------------|-------------------------------------------------------------------|------------|-----------|
| <b>Study</b>                                                        | <b>N</b> | <b>Follow-up Months (Range)</b> | <b>cCR (n%)</b> | <b>LR (n%)</b>  | <b>Salvage (%) (Details and other notes if available)</b>                                                                         | <b>DM</b>                                                         | <b>DFS</b> | <b>OS</b> |
| Habr-Gama A<br>2004<br>PMID: 15383798                               | 265      | Mean 57.3<br>(12-156)           | 71/265 (26.8)   | 2/71 (3%)       | 97% (69/71)<br>- 2 TAE/SBRT<br><br>**100% (69/69)                                                                                 | 3/71 (4.2%)<br>- 3 systemic CTX                                   | 92% (5Y)   | 100% (5Y) |
| Habr-Gama A<br>2014<br>PMID:<br>24495589                            | 183      | Median 60<br>(12-233)           | 90/183 (49%)    | 28/90<br>(31%)  | 93%* (26/28)<br>- 25 R0 TME<br>- 1 SBRT<br>- 2 no salvage<br>**84% (22/26)<br>- 4 palliative procedures                           | 8/90 (8.9%)<br>-1 curative liver rsxn<br>-7 systemic CTX          | 68% (5Y)   | 91% (5Y)  |
| Maas M<br>2011<br>PMID:<br>22067400                                 | 192      | Mean 25 (+/-<br>19)             | 21/192 (11%)    | 1/21 (4.8%)     | 1/ 21 (4.8%)<br>- 1 TAE                                                                                                           | 0/21 (0%)                                                         | 89% (2y)   | 100% (2Y) |
| Martens MH<br>2016<br>PMID:<br>27509881                             | 100      | Median 41.1<br>(12-120)         | 61/100 (61%)    | 15/100<br>(15%) | 87%* (13/15)<br>13 R0 TME<br>- 8 APR<br>- 5 LAR<br><br>- 2 LR:<br>-1 SBRT to lung/Papillon to regrowth tumor<br>-1 palliative CTX | 5/100 (5%)<br>- 4 lung (OR, CTX & RT)<br><br>- 1 peritoneum (POD) | 81% (3Y)   | 97% (3Y)  |

|                                                      |                                            |                                            |                                                |                                              |                                                                                                                                                                               |                                                                                |          |                                                            |
|------------------------------------------------------|--------------------------------------------|--------------------------------------------|------------------------------------------------|----------------------------------------------|-------------------------------------------------------------------------------------------------------------------------------------------------------------------------------|--------------------------------------------------------------------------------|----------|------------------------------------------------------------|
| Appelt A 2016<br>PMID:<br>26156652                   | 51                                         | Median 24<br>(15-31)                       | 40/51 (78%)                                    | 9/40 (23%)                                   | *100% (9/9)<br>9 R0 TME<br>- 9 APR<br>**100% (9/9)                                                                                                                            | 3/40 (8%)<br>- 3 lung rxns                                                     | 70% (2Y) | 100% (2Y)                                                  |
| Renehan A 2016<br>PMID:<br>26705854                  | 259<br>(+98 WW<br>ONLY<br>via<br>registry) | Median 33<br>(19-43)                       | 129 / 259<br>(50%)<br><br>(31 +98<br>registry) | 44/129<br>(34%)                              | *68% (30/44)<br>30 R0 TME<br><u>(Others:</u><br>- 1 R1 resection<br>- 5 Papillon<br>- 5 Palliative<br>CTX/other<br>- 1 APR + Liver<br>(LR+DM)<br>- 2 chemo only<br>(LR + DM)) | 7/129 (6%)<br>- 3 liver<br>rxns<br>- 1 inguinal<br>rxns<br>- 3 systemic<br>CTX | NR       | 96% (3Y)                                                   |
| Van der Valk<br>MJM 2018<br>PMID:<br>29976470        | 880                                        | Median 39.6<br>(95% CI<br>37.2%-<br>43.2%) | -                                              | 213/667<br>(24%)<br><br>- 2-year<br>rate 25% | *Only 148 of 213<br>with data<br>- 46 TAE<br>- then 13 TME<br>(included below in<br>TME count)<br>- 115 TME<br>- 101 R0 88%<br>- 7 R1 (6%)<br>- 7 R status<br>unknown (6%)    | 71/809 (8%)<br>- No<br>treatment<br>details                                    | NR       | 85% (5Y)<br>-88% if no<br>regrowth<br>- 75% if<br>regrowth |
| Smith JJ 2018<br><i>JAMA Oncol.</i><br>PMID: pending | 249                                        | Median 43<br>(IQR 27-43)                   | 113/1070<br>(11%)                              | 22/113<br>(19.5%)                            | 100%* (22/22)<br>2 TAE                                                                                                                                                        | 9/113 (8%)<br>- 5 systemic                                                     | 75% (5Y) | 73% (5Y)                                                   |

|                                                                                                                                                                                                                                                                                                                                                                                         |                                                                             |                                                           |  |  |                                                                                                                                                                            |                                                                                                                                                    |  |  |  |
|-----------------------------------------------------------------------------------------------------------------------------------------------------------------------------------------------------------------------------------------------------------------------------------------------------------------------------------------------------------------------------------------|-----------------------------------------------------------------------------|-----------------------------------------------------------|--|--|----------------------------------------------------------------------------------------------------------------------------------------------------------------------------|----------------------------------------------------------------------------------------------------------------------------------------------------|--|--|--|
|                                                                                                                                                                                                                                                                                                                                                                                         | -113 WW<br>(eTable<br>data is<br>focused<br>on WW<br>group)<br><br>-136 pCR | - WW median<br>33 months<br><br>- pCR median<br>55 months |  |  | 20 R0 TME<br><br>- 9 LAR<br><br>- 11 APR<br><br>**91% (20/22)<br><br>- 2 eventual<br>pelvic<br>recurrences<br><br>- 1 small bowel<br>bowel bypass<br><br>-1 palliative CTX | CTX<br><br>- 1 lung rsxn<br>(no local<br>regrowth)<br><br>- 1 lung<br>stable on<br>CTX<br><br>- 1 liver<br>SBRT<br><br>- 1 supportive<br>care only |  |  |  |
| cCR = clinical complete response<br>LR = local regrowth<br>DM = distant metastasis rate<br>DFS = disease-free survival rate<br>OS = overall survival<br>pCR = pathologic complete response                                                                                                                                                                                              |                                                                             |                                                           |  |  | *Salvage surgery<br>performed<br>**Long-term<br>pelvic control (if<br>reported)<br>- not reported                                                                          | CTX = chemotherapy<br>resxn = resection<br>OR = operating room<br>RT = radiation therapy<br>POD = progression of disease                           |  |  |  |
| Y = year; R0 = margin negative resection; R1 = microscopic margins positive; TAE = transanal excision; SBRT = stereotactic body radiation therapy; IQR = interquartile range                                                                                                                                                                                                            |                                                                             |                                                           |  |  |                                                                                                                                                                            |                                                                                                                                                    |  |  |  |
| <u>Additional notes on local regrowth vs. no local regrowth and metastasis rates in PMID 29976470 and in our current paper:</u><br>Van der Valk MJM et al. <i>Lancet</i> 2018: Local regrowth metastasis rate = 18% vs. No local regrowth metastasis rate = 5%<br>Smith et al. <i>JAMA Oncol.</i> 2018: Local regrowth metastasis rate = 36% vs. No local regrowth metastasis rate = 1% |                                                                             |                                                           |  |  |                                                                                                                                                                            |                                                                                                                                                    |  |  |  |
